# Supplementary material for: Shape-dependent photocatalytic activity of Bi5O7I caused by facets synergetic and internal electric field effects
Source: Royal Society of Chemistry journal article supplement (doi:10.1039/c4ra08431d), 2014-01-01
Supplement: c4ra08431d1.pdf [file c4ra08431d1.pdf]

## Shape-Dependent Photocatalytic Activity of $\text{Bi}_5\text{O}_7\text{I}$ Caused by Facets Synergetic and Internal Electric Field Effects

Yurong Su,<sup>a</sup> Hui Wang,<sup>b</sup> Liqun Ye,<sup>a\*</sup> Xiaoli Jin,<sup>a</sup> Haiquan Xie,<sup>a\*</sup> Chaozheng He<sup>c</sup> and Keyan Bao<sup>a</sup>

<sup>a</sup> College of Chemistry and Pharmaceutical Engineering, Nanyang Normal University, Nanyang 473061, People's Republic of China.

<sup>b</sup> CAS Key Laboratory of Nuclear Radiation and Nuclear Energy Techniques, and Multidisciplinary Initiative Center, Institute of High Energy Physics, Chinese Academy of Sciences, Beijing, 100049, China.

<sup>c</sup> College of Physics and Electronic Engineering, Nanyang Normal University, Nanyang 473061, People's Republic of China.

### Corresponding Author

\* E-mail: yeliquny@163.com (L. Ye)

xie-hq@163.com (H. Xie)

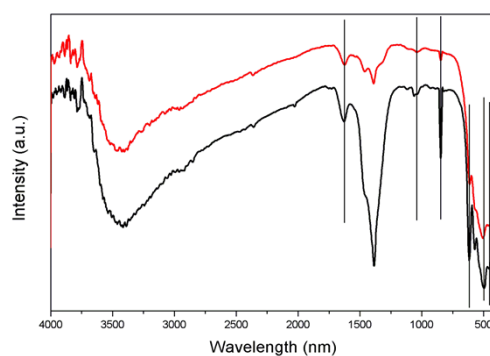

**Fig. S1.** FTIR of  $\text{Bi}_5\text{O}_7\text{I}$  rods and  $\text{Bi}_5\text{O}_7\text{I}$  sheets.

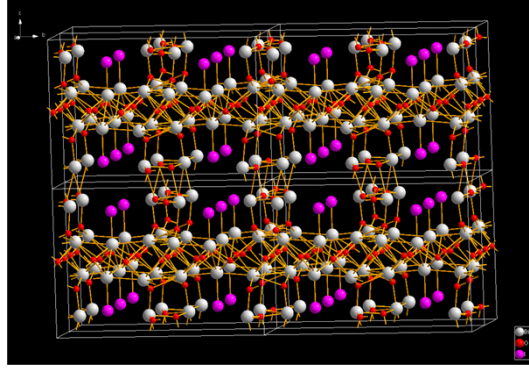

**Fig. S2.** The structure model illustration of Bi<sub>5</sub>O<sub>7</sub>I crystals (2×2 lattices).
